1

2 **Inhibitory effect of an anti-prokineticin-1**  
3 **antibody on liver metastases in mice injected**  
4 **with human colorectal cancer cell lines**

5 Short title: Anti-prokineticin-1 antibody and liver metastases in mice  
6 injected with CRC cell lines

7

8 Hiroko Kono\*, Takanori Goi, Hidetaka Kurebayashi, Katsuji Sawai,

9 Mitsuhiro Morikawa, Kenji Koneri

10 First Department of Surgery, Faculty of Medical Sciences, University of

11 Fukui, Japan

12

13

14 **\*Corresponding author:**

15 E-mail: [hyrk@u-fukui.ac.jp](mailto:hyrk@u-fukui.ac.jp) (HK)

16

## 17 **Abstract**

18 Controlling hematogenous metastases is an effective treatment strategy  
19 for colorectal cancer. Multidisciplinary treatment for colorectal cancer has  
20 made great strides, and molecularly-targeted drugs have greatly improved  
21 the prognosis of patients. However, currently accepted molecularly-  
22 targeted therapeutic agents require concomitant use with anticancer  
23 agents. Thus, new molecularly-targeted drugs need to be developed. The  
24 prokineticin family of angiogenic factors has the potential of becoming  
25 target molecules. Among them, prokineticin-1 (PROK1) is involved in the  
26 promotion of angiogenesis, tumor growth, and liver metastases in  
27 colorectal cancer. We manufactured our own anti-PROK1 antibody and  
28 verified its effect in inhibiting liver metastases and prolonging survival.  
29 The method involved creating liver metastasis model mice using human  
30 colorectal cancer cell lines. These mice were divided into anti-PROK1  
31 antibody administration and control groups. Mice were treated  
32 intraperitoneally with antibodies or phosphate-buffered saline (control)  
33 every 3 days. The number of liver metastatic lesions and survival time of  
34 each group were compared. The number of metastatic lesions decreased,  
35 and survival time was significantly prolonged in the antibody-treated

36 group. Furthermore, using microarray and immunostaining in both groups,  
37 we confirmed the effect of administering the anti-PROK1 antibody on the  
38 oxidation, reduction, and apoptotic processes, and cell division of tumors,  
39 and that alterations were suppressed in 72.1% of the genes examined. The  
40 expression of transforming growth factor- $\beta$  (TGF- $\beta$ ), a tumor suppressor  
41 gene, was increased. The increased expression of TGF- $\beta$  via PROK1  
42 antibody administration may suppress the cancer cell proliferation ability,  
43 leading to liver metastasis suppression and prolonging the survival time of  
44 mice.

45

## 46 **Introduction**

47 Colorectal cancer is a highly prevalent malignancy worldwide, including in  
48 Japan [1-4]. The prognosis of colorectal cancer at an early stage is  
49 favorable, but the prognosis of unresectable, advanced colorectal cancer  
50 is not yet satisfactory. According to statistics of the Ministry of Health,  
51 Labor, and Welfare in Japan, the number of deaths from colorectal cancer  
52 continues to increase, exceeding 50,000 in 2016.

53 While there are various metastasis modes in colorectal cancer, such as  
54 lymph node, peritoneal, and hematogenous metastases, most patients face  
55 poor prognosis due to hepatic and other hematogenous metastases [5-7].  
56 Recently, the prognosis of patients with colorectal cancer has improved  
57 due to great progress in multidisciplinary treatment. However, there is  
58 currently no treatment method that is capable of significantly improving  
59 the prognosis of patients when distant metastasis or recurrence is  
60 observed.

61 Angiogenic growth factors are important, and several such factors are  
62 thought to be involved in the development of colorectal cancer [8-10]. The  
63 prokineticin family of proteins, which we have focused on and studied  
64 throughout the years, is one family of angiogenic factors. It consists of two

65 types of proteins: prokineticin-1 (PROK1) and PROK2. PROK1 is expressed  
66 in normal endocrine tissues of the adrenal gland, ovaries, and testes, and  
67 promotes the growth of vascular endothelial cells under hypoxic conditions.  
68 However, PROK1 is not homologous to vascular endothelial growth factor  
69 (VEGF) and is completely different from the known VEGF family of  
70 proteins [11].

71 To date, our laboratory has reported the involvement of PROK1 in tumor  
72 growth, angiogenesis, and infiltration in colorectal cancer through in vitro  
73 and in vivo experimental systems [12-14]. In this study, we used the anti-  
74 PROK1 antibody that was prepared in our laboratory and demonstrated its  
75 metastasis inhibitory effect on human colorectal cell lines using a liver  
76 metastasis mouse model.

77

## 78 **Materials and Methods**

### 79 **Confirmation of PROK1 expression in human** 80 **colorectal cancer cell lines**

81 Human colorectal cancer cell lines (HCT116, HT29, DLD-1) were cultured  
82 at 37 °C under 5% CO<sub>2</sub> for 3 days using RPMI medium with 10% fetal  
83 bovine serum. They were then frozen with an optimal cutting temperature

84 compound, dissected into 4- $\mu$ m sections with a microtome, and stained  
85 overnight at 4 °C using an anti-PROK1 antibody (Novus Biologicals,  
86 Littleton, CO, USA).

## 87 **Liver metastasis mouse model**

88 Human colorectal cancer cells ( $1 \times 10^6$ ) were injected under the spleen  
89 capsule of male SHO mice to prepare the liver metastasis mouse model.

90 Antibody administration and control groups were prepared for each  
91 colorectal cancer line (n = 5). In the antibody treatment group, the anti-  
92 PROK1 antibody (500  $\mu$ g) was administered intraperitoneally the day  
93 before tumor cell injection under the spleen capsule and every 3 days after  
94 injection. In the control group, phosphate-buffered saline was  
95 administered intraperitoneally in the same manner. The anti-PROK1  
96 antibody was originally prepared by our department as described  
97 previously [15].

98 The number of metastatic regions in the liver and the survival times of  
99 each group were compared. Mice were examined daily for their general  
100 condition and signs of moribund behavior. The mice were considered  
101 moribund when they could no longer reach out to water and/or food and  
102 were euthanized within 4 h of reaching moribund status. Survival curves

103 were established using the Kaplan-Meier method, and a significant  
104 difference was determined at  $p < 0.05$  using the log-rank test.

## 105 **Microarray**

106 Using ISOSPIN Cell & Tissue RNA (Nippon Gene, Yoyama, Japan), total  
107 RNA was extracted from the primary lesions and metastatic regions in the  
108 liver and spleen of mice, and a microarray was performed. In the  
109 microarray, 24,351 genes were analyzed using the Clariom S Array, and  
110 human GeneChip (Thermo Fisher Scientific, Waltham, MA, USA).

## 111 **Immunohistochemical staining of liver metastases**

112 Liver metastatic tissue was sliced at 10  $\mu\text{m}$  thickness with a microtome  
113 and stained overnight at 4  $^{\circ}\text{C}$  with an anti-Ki67 antibody (Novus  
114 Biologicals). The mean numbers of positive cells at 400 $\times$  magnification  
115 were compared between the two groups, and the Mann-Whitney U test was  
116 used to determine any significant difference, which was set at  $p < 0.05$ .  
117 All statistical analyses were performed using EZR software [16].

118

## 119 **Results**

### 120 **Immunostaining of human colorectal cancer cell** 121 **lines**

122 Cytoplasm was stained with the anti-PROK1 antibody in the HCT116, HT29,  
123 and DLD-1 cell lines (Fig 1). This demonstrated the presence of PROK1 in  
124 these lines.

125

126 **Fig 1. Immunohistochemical staining of colorectal cancer cell lines.**

127 Prokineticin-1 (PROK1) is stained in the cytoplasm of HCT116, HT29, and  
128 DLD-1 cells.

129

130 **Reduction of liver metastasis**

131 Two weeks after injection of each colorectal cancer cell line, we confirmed  
132 that liver metastases were formed in all mice (Fig 2A). We removed the  
133 livers and confirmed the number of metastatic regions in each liver (Fig  
134 2B). The median numbers of these regions were: HCT116 (control group:  
135 95; antibody group: 68); HT29 (control group: 70; antibody group: 60); and  
136 DLD-1 (control group: 9; antibody group: 2). These results indicated that  
137 there were fewer liver metastases in the antibody-administered than in the  
138 control group.

139

140 **Fig 2. Images of liver metastases.** A. Liver metastasis 2 weeks after



141 spleen injection of the HCT116 cell line. Left: control group, Right:  
142 antibody group. B. Liver removed at the time of death. Left: control group,  
143 Right: antibody group.

144

## 145 **Extension of survival time**

146 We established survival curves for each group and compared the median  
147 survival times: HCT116 (control group: 33 days; antibody group: 26 days;  
148  $p = 0.00885$ ); HT29 (control group: 28 days; antibody group: 46 days;  $p =$   
149  $0.0279$ ); and DLD-1 (control group: 28 days; antibody group: 13 days;  $p =$   
150  $0.00249$ ). The p-value for the survival time of mice ( $n = 15$ ) was  $p = 0.0273$ .  
151 The survival time was significantly prolonged in the antibody-administered  
152 group (Fig 3).

153

154 **Fig 3. Comparison of survival times.** Mice injected with HCT116, HT29,  
155 and DLD-1 cells all show a significant increase in the survival time when  
156 treated with the anti-prokineticin-1 antibody. The survival curve was  
157 created by the Kaplan-Meier method.

158

## 159 **Microarray**

160 The heat map showed that genetic changes were inhibited in the antibody-  
161 treated mice (Fig 4). Specifically, the microarray revealed that changes  
162 were inhibited in 72.1% of the 24,351 analyzed genes. In addition, when  
163 the functions of genes that were significantly changed upon antibody  
164 administration (genes that had increased or decreased expression more  
165 than two-fold due to antibody administration) were analyzed using DAVID  
166 functional annotation, we found that the expression of genes involved in  
167 oxidation-reduction and apoptotic processes, and cell division, were  
168 significantly changed ( $p < 0.05$ ) (Fig 5A). Among the altered genes, some  
169 were involved in the p53 cascade. In addition, there was an increase in the  
170 expression of transforming growth factor- $\beta$  (TGF- $\beta$ ), which is a tumor  
171 suppressor gene (Fig 5B).

172

173 **Fig 4. Microarray heatmap.** A microarray was performed to detect liver  
174 metastases-related genetic changes at the time of death. This map shows  
175 that genetic changes are suppressed in the anti-prokineticin-1 antibody-  
176 administered group compared to the control group.

177

178 **Fig 5.** we found that the expression of genes involved in oxidation-

179 reduction and apoptotic processes, and cell division, were significantly  
180 changed ( $p < 0.05$ ).

181

## 182 **Immunohistochemical staining of liver metastases**

183 The median numbers of Ki67-positive cells in each group were compared:  
184 HCT116 (control group: 74.3; administration group: 24.3;  $p = 0.0159$ );  
185 HT29 (control group: 92.3; administration group: 39.3;  $p = 0.0159$ ); and  
186 DLD-1 (control group: 99.7; administration group: 11.0;  $p = 0.0119$ ). The  
187 p-value for the liver metastasis in mice ( $n = 15$ ) was  $p = 0.000013$ . Liver  
188 metastasis-positive cells significantly decreased in the antibody-treated  
189 groups with each of the cell lines in these animal models.

190

## 191 **Discussion**

192 At present, antibody-based drugs, such as the ones targeting VEGF, are  
193 used clinically as molecularly-targeted therapeutic agents for  
194 gastrointestinal cancer, and improved prognosis has been observed in  
195 unresectable advanced colorectal cancer [17]. VEGF is thought to act on  
196 the interstitium around cancer cells and facilitate metastasis. According to  
197 several reports, VEGF and hematogenous metastasis are closely related in

198 lung, breast, and renal cancers [18–20]. Thus, drugs affecting VEGF have  
199 anticancer effects. For example, bevacizumab has a VEGF-neutralizing  
200 effect and normalizes the vasculature, which improves the delivery and  
201 effectiveness of chemotherapeutic agents [12-23]. Ziv-Aflibercept is a  
202 receptor-antibody complex consisting of VEGF-binding sections from the  
203 extracellular domains of VEGF receptors 1 and 2, fused to human  
204 immunoglobulin IgG1Fc [24]. Regorafenib targets VEGF 1-3, TIE2, and  
205 other receptor tyrosine kinases [25]. However, malignant tumors cannot  
206 be suppressed completely via administration of these molecularly targeted  
207 therapeutic agents alone; therefore, there is a demand for better  
208 therapeutic drugs.

209 Hematogenous metastases, which involve multiple angiogenic factors,  
210 account for about 80% of remote metastases in colorectal cancer. Thus,  
211 controlling hematogenous metastases is an important therapeutic strategy  
212 for this disease [26,27]. To date, our laboratory has carried out continuous  
213 studies focusing on the angiogenic factor, PROK1, as a target molecule for  
214 treating cancer. The anti-PROK1 monoclonal antibody produced by our  
215 department is a neutralizing antibody that has been proven to inhibit the  
216 angiogenic and subcutaneous tumorigenic potentials when added to

217 colorectal cancer cell lines [12,13,15]. While PROK1 staining is not  
218 observed in the normal mucosa of the large intestine, it is present in the  
219 cytoplasm of cells in about 40% of colorectal cancers. Positive staining is  
220 significantly higher in stages III and IV, which indicates more advanced  
221 colorectal cancer than stages I and II. It has also been clarified that PROK1  
222 expression is a prognostic factor in colorectal cancer. Specifically, the 5-  
223 year survival rate is lower when PROK1 expression is observed than that  
224 when it is not observed in stage III and IV colorectal cancer [28].

225 Goi et al. demonstrated that an anti-PROK1 antibody inhibited  
226 angiogenesis and tumorigenic potential [4]. In the present study, we  
227 applied our anti-PROK1 antibody in a mouse model of cancer to investigate  
228 how it acted on liver metastases. To maintain its concentration in the blood,  
229 the anti-PROK1 antibody was administered intraperitoneally the day  
230 before tumor implantation and every 3 days thereafter. In the antibody-  
231 treated group, liver metastases were decreased and a significant increase  
232 in survival time was observed when compared to the control group.

233 The microarray revealed that genetic changes were suppressed upon  
234 administration of the anti-PROK1 antibody; changes were inhibited in  
235 72.1% of the 24,351 analyzed genes. The altered genes included some

236 involved in the p53 cascade as well as an increase in the tumor suppressor  
237 gene, TGF- $\beta$ . TGF- $\beta$  contributes to growth inhibition, cell differentiation,  
238 and the induction of apoptosis in many cells, including epithelial cells. In  
239 addition, TGF- $\beta$  is involved in the epithelial-mesenchymal transition in  
240 cancer cells, and enhances the motility and infiltration of epithelial cells  
241 [29].

242 In this study, we examined the action of TGF- $\beta$  indirectly by performing  
243 immunostaining to detect liver metastases in both groups using an anti-  
244 Ki67 antibody. The results showed significantly fewer Ki67-positive cells  
245 in the antibody-treated group, indicative of inhibited metastases. Overall,  
246 the proliferation of colorectal cancer cells was suppressed in the anti-  
247 PROK1 antibody-treated group. We believe that administration of the anti-  
248 PROK1 antibody suppressed liver metastases by increasing the expression  
249 of TGF- $\beta$  and enhancing cancer cell suppression. Moving forward, we  
250 intend to examine the application of the anti-PROK1 antibody in other  
251 gastrointestinal cancers using the peritoneal dissemination model, as well  
252 as in gastric cancer and pancreatic cancer cell lines.

253

## 254 **Conclusion**

255 We found that the anti-PROK1 antibody acted on the oxidation-reduction  
256 and apoptotic processes, and inhibited cell division of tumors in a liver  
257 metastasis mouse model using human colon cancer cell lines. We also  
258 believe that the increased expression of TGF- $\beta$  following anti-PROK1  
259 antibody administration may prolong the survival time of mice by  
260 suppressing cell growth and liver metastases.

261

## 262 **References**

- 263 1 Fidler IJ, Ellis LM. The implications of angiogenesis for the biology and  
264 therapy of cancer metastasis. *Cell*. 1994;79: 185-188.
- 265 2 Jemal A, Bray F, Cancer MM, Ferlay J, Ward E, Forman D. Global cancer  
266 statistics. *CA Cancer J Clin*. 2011;61: 69-90.
- 267 3 American Cancer Society. Cancer facts and figures 2012., Atlanta 2012.  
268 Available from: <http://www.cancer.org/Research/Cancerfacts/index>
- 269 4 Watanabe T, Itabashi M, Shimada Y, Tanaka S, Ito Y, Ajioka Y, et al.  
270 Japanese Society for Cancer of the Colon and Rectum (JSCCR)  
271 guidelines 2010 for treatment of colorectal cancer. *Int J Clin Oncol*.  
272 2012;17: 1-29.
- 273 5 Nordlinger B, Van Cutsem E, Gruenberger T, Glimelius B, Poston G,

- 274 Rougier P, et al. Combination of surgery and chemotherapy and the role  
275 of targeted agents in the treatment of patients with colorectal liver  
276 metastases: Recommendations from an expert panel. *Ann Surg.*  
277 2006;224: 254-259.
- 278 6 Manfredi S, Lepage C, Hatem C, Coatmeur O, Faivre J, Bouvier AM.  
279 Epidemiology and management of liver metastases from colorectal  
280 cancer. *Ann Oncol.* 2009;20: 985-992.
- 281 7 Smith MD, McCall JL. Systematic review of tumor number and outcome  
282 after radical treatment of colorectal liver metastases. *Br J Surg.*  
283 2009;96: 1101-1113.
- 284 8 Rmali KA, Puntis MC, Jiang WG. Tumor-associated angiogenesis in  
285 human colorectal cancer. *Colorectal Dis.* 2007;9: 3-14.
- 286 9 Kamba T, McDonald DM. Mechanisms of adverse effects of anti VEGF  
287 therapy for cancer. *Br J Cancer.* 2007;6: 1788-1795.
- 288 10 Bose D, Meric-Bernstam F, Hofstetter W, Reardon DA, Flatherty KT,  
289 Ellis LM. Vascular endothelial growth factor targeted therapy in the  
290 perioperative setting: implications for patient care. *Lancet Oncol.*  
291 2010;11: 373-382.
- 292 11 LeCouter J, Kowalski J, Foster J, Hass P, Zhang Z, Dillard-Telm L, et al.



- 293 Identification of an angiogenic mitogen selective for endocrine gland  
294 endothelium. *Nature*. 2001;412: 877-884.
- 295 12 Goi T, Fujioka M, Satoh Y, Tabata S, Koneri K, Nagano H, et al.  
296 Angiogenesis and tumor proliferation/metastasis of human colorectal  
297 cancer cell line SW620 transfected with endocrine glands-derived-  
298 vascular endothelial growth factor, as a new angiogenic factor. *Cancer*  
299 *Res*. 2004;64: 1906-1910.
- 300 13 Goi T, Nakazawa T, Hirono Y, Yamaguchi A. Anti-prokineticin 1 (PROK1)  
301 monoclonal antibody suppresses angiogenesis and tumor growth in  
302 colorectal cancer. *Ann Surg Oncol*. 2014;21: 665-671.
- 303 14 Goi T, Nakazawa T, Hirono Y, Yamaguchi A. Prokineticin 1 expression  
304 in gastrointestinal tumors. *Anticancer Res*. 2013;33: 5311-5315.
- 305 15 Goi T, Nakazawa T, et al. Endocrine gland-derived vascular endothelial  
306 growth factor may play for a new therapy. *Jpn J Cancer Clin*. 2012;58:  
307 341-347.
- 308 16 Kanda Y. Investigation of the freely-available easy-to-use software "EZR"  
309 (Eazy R) for medical statistics. *Bone Marrow Trans*. 2013;48: 452-458.
- 310 17 Japanese Society for Cancer of Colon and Rectum guidelines 2019 for  
311 the treatment of Colorectal Cancer.

- 312 18 Sandler A, Gray R, Perry MC, Brahmer J, Schiller JH, Dowlati A, et al.  
313 Paclitaxel-carboplatin alone or with bevacizumab for non-small-cell  
314 lung cancer. *N Engl J Med.* 2006;355: 2542-2550.
- 315 19 Miller K, Wang M, Gralow J, Dickler M, Cobleigh M, Perez EA, et al.  
316 Paclitaxel plus bevacizumab versus paclitaxel alone for metastatic  
317 breast cancer. *N Engl J Med.* 2007;357: 2666-2676.
- 318 20 Escudier B, Pluzanska A, Koralewaki P, Ravaud A, Bracarda S, Szczylik  
319 C, et al. Bevacizumab plus interferon alfa-2a for treatment of metastatic  
320 renal cell carcinoma: a randomized, double-blind phase III trial. *Lancet.*  
321 2007;370: 2103-2111.
- 322 21 Saltz LB, Clarke S, Díaz-Rubio E, Scheithauer W, Figer A, Wong R, et  
323 al. Bevacizumab in combination with oxaliplatin-based chemotherapy  
324 as first line therapy in metastatic colorectal cancer: a randomized phase  
325 III study. *J Clin Oncol.* 2008;26: 2013-2019.
- 326 22 Hickin DJ, Ellis LM. Role of the vascular endothelial growth factor  
327 pathway in tumor growth and angiogenesis. *J Clin Oncol.* 2005;23:  
328 1011-1027.
- 329 23 Jain RK. Normalizing tumor vasculature with anti-angiogenic therapy:  
330 a new paradigm for combination therapy. *Nat Med.* 2001;7: 987-989.

- 331 24 Tabernero J, Van Cutsem E, Lakomý R, Prausová J, Ruff P, van Hazel  
332 GA, et al. Aflibercept versus placebo in combination with fluorouracil,  
333 leucovorin and irinotecan in the treatment of previously treated  
334 metastatic colorectal cancer: prespecified subgroup analyses from the  
335 VELOUR trial. *Eur J Cancer*. 2014;50: 320-331.
- 336 25 Grothey A, Van Cutsem E, Sobrero A, Siena S, Falcone A, Ychou M, et  
337 al. Regorafenib monotherapy for previously treated metastatic  
338 colorectal cancer (CORRECT): An international, multicenter,  
339 randomised, placebo-controller, phase 3 trial. *Lancet*. 2013;381: 303-  
340 312.
- 341 26 Hanahan D, Folkman J. Patterns and emerging mechanisms of the  
342 angiogenic switch during tumorigenesis. *Cell*. 1996;86: 353-364.
- 343 27 Joyce JA, Pollard JW. Microenvironmental regulation of metastasis. *Nat*  
344 *Rev Cancer*. 2009;9: 239-252.
- 345 28 Nakazawa T, Goi T, Yasuo H, Yamaguchi A. Prokineticin 1 protein  
346 expression is a useful new prognostic factor for human sporadic  
347 colorectal cancer. *Oncology*. 2015;22: 1496-1503.
- 348 29 Miyazono K, Ehata S, Koinuma D. Tumor-promoting functions of  
349 transforming growth factor- $\beta$  in progression of cancer. *Ups J Med Sci*.

350        2012;117: 143-152.

351

352

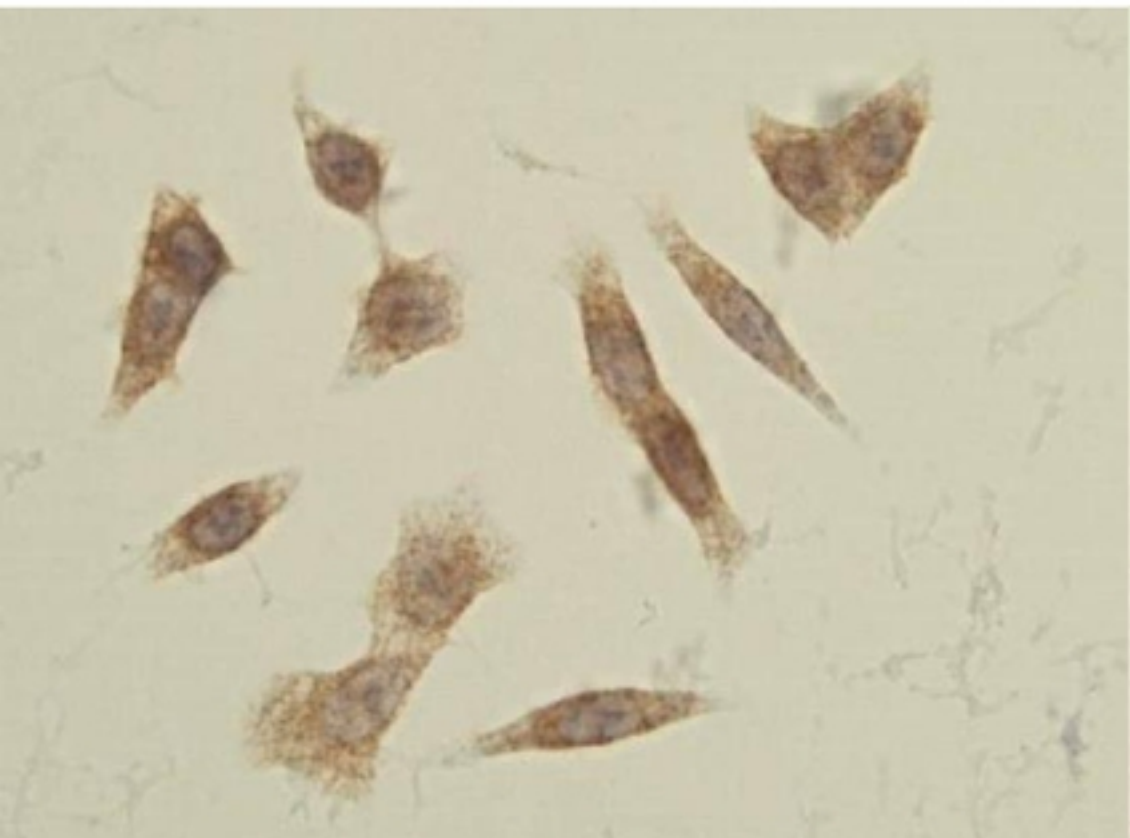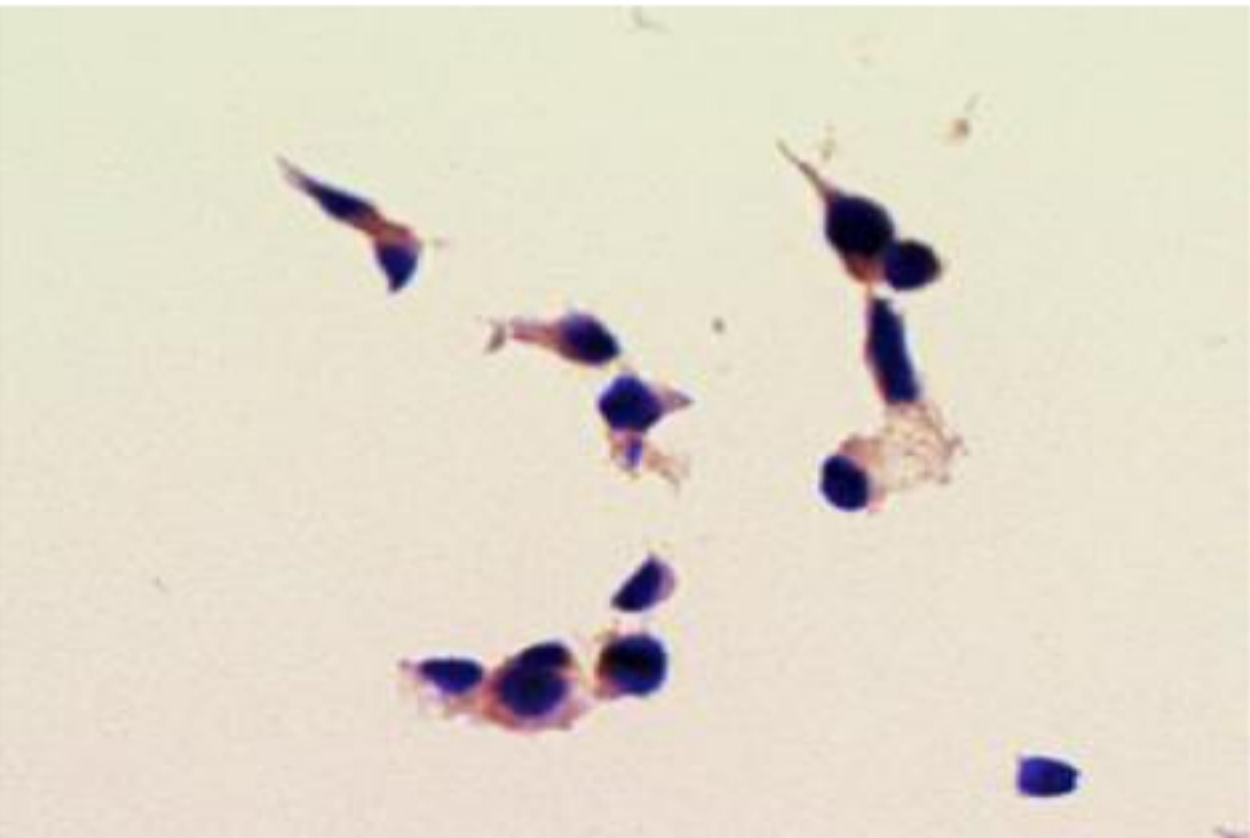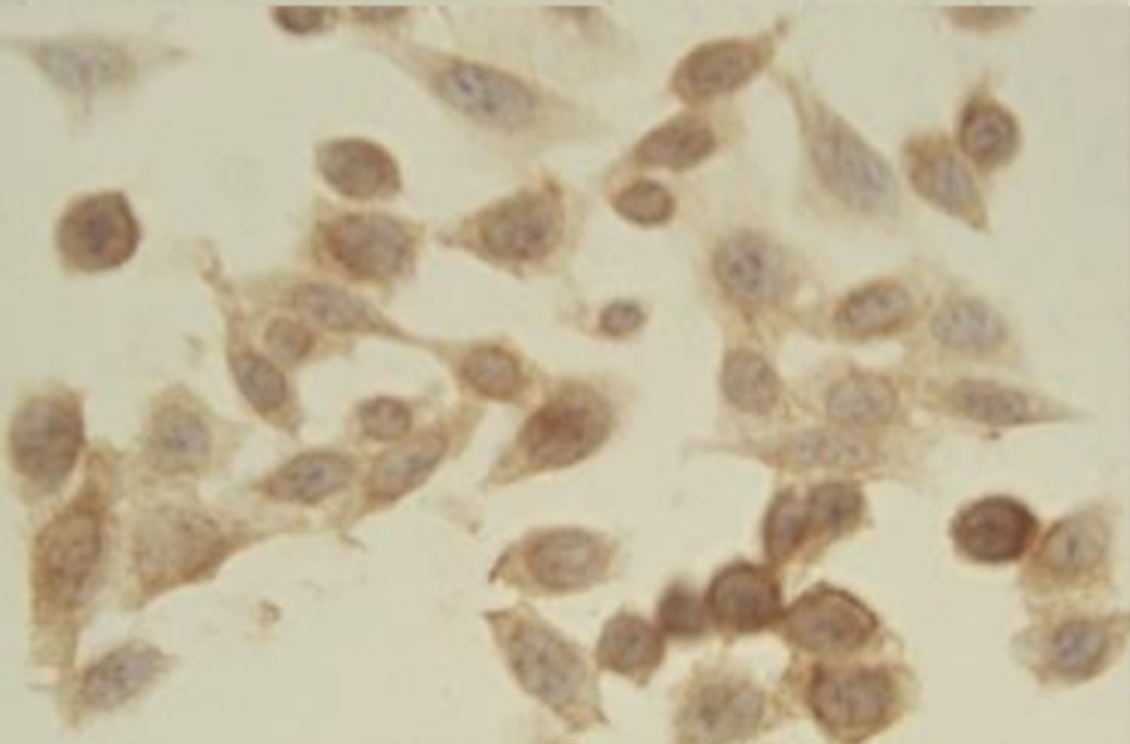

PROK1 in the cytoplasm of HCT116, HT29, DLD-1 were stained

|        |      |
|--------|------|
| HCT116 | HT29 |
| DLD-1  |      |

Figure 1

a

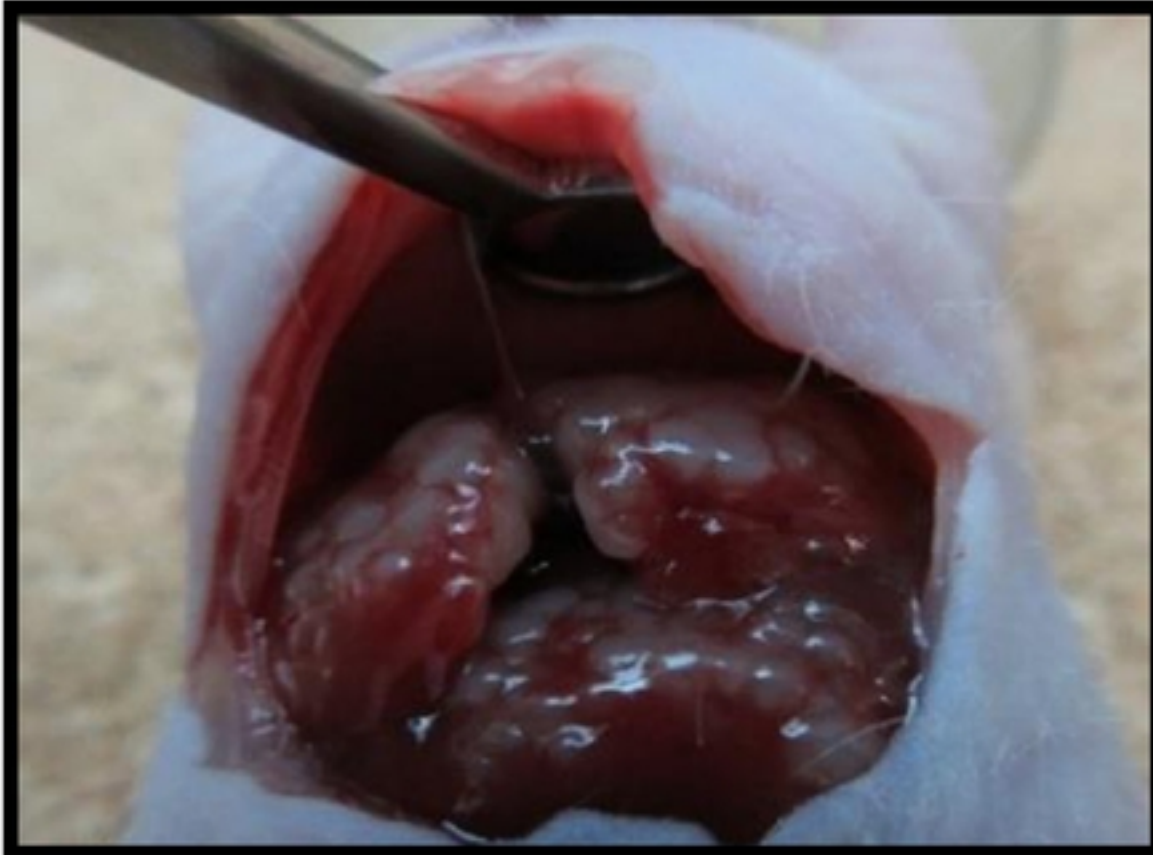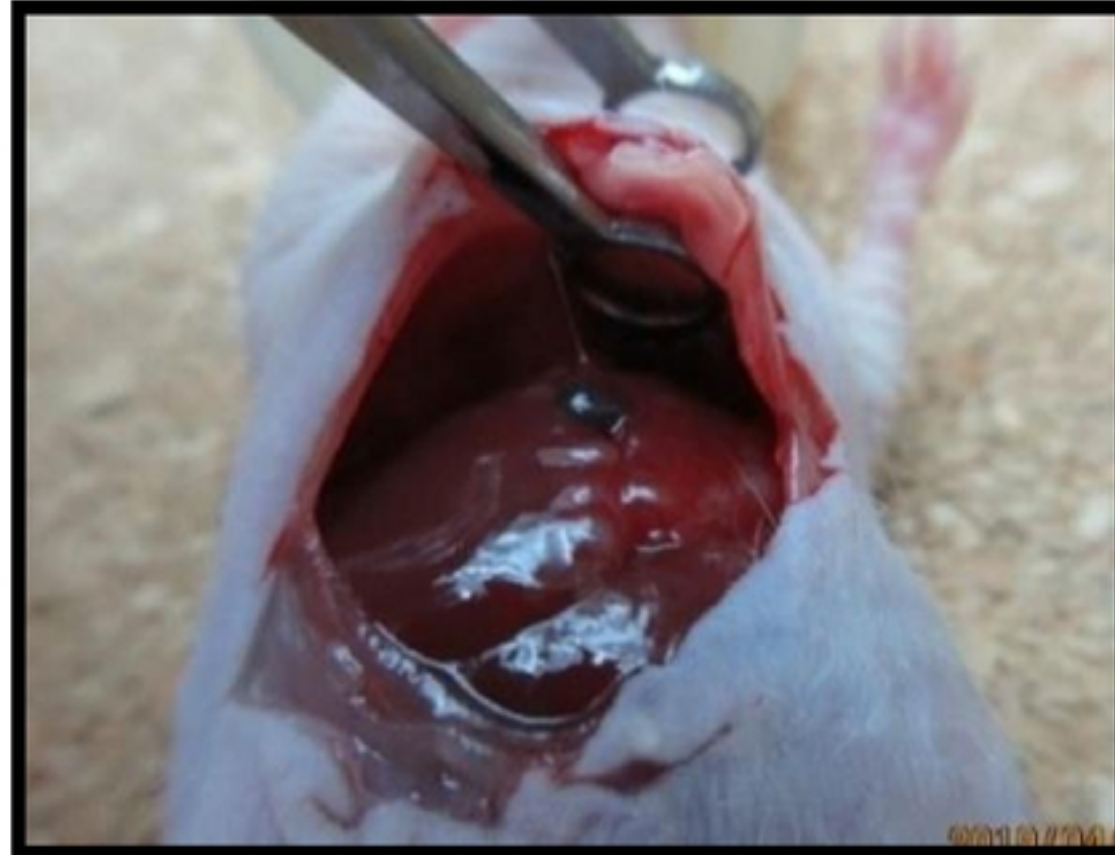

b

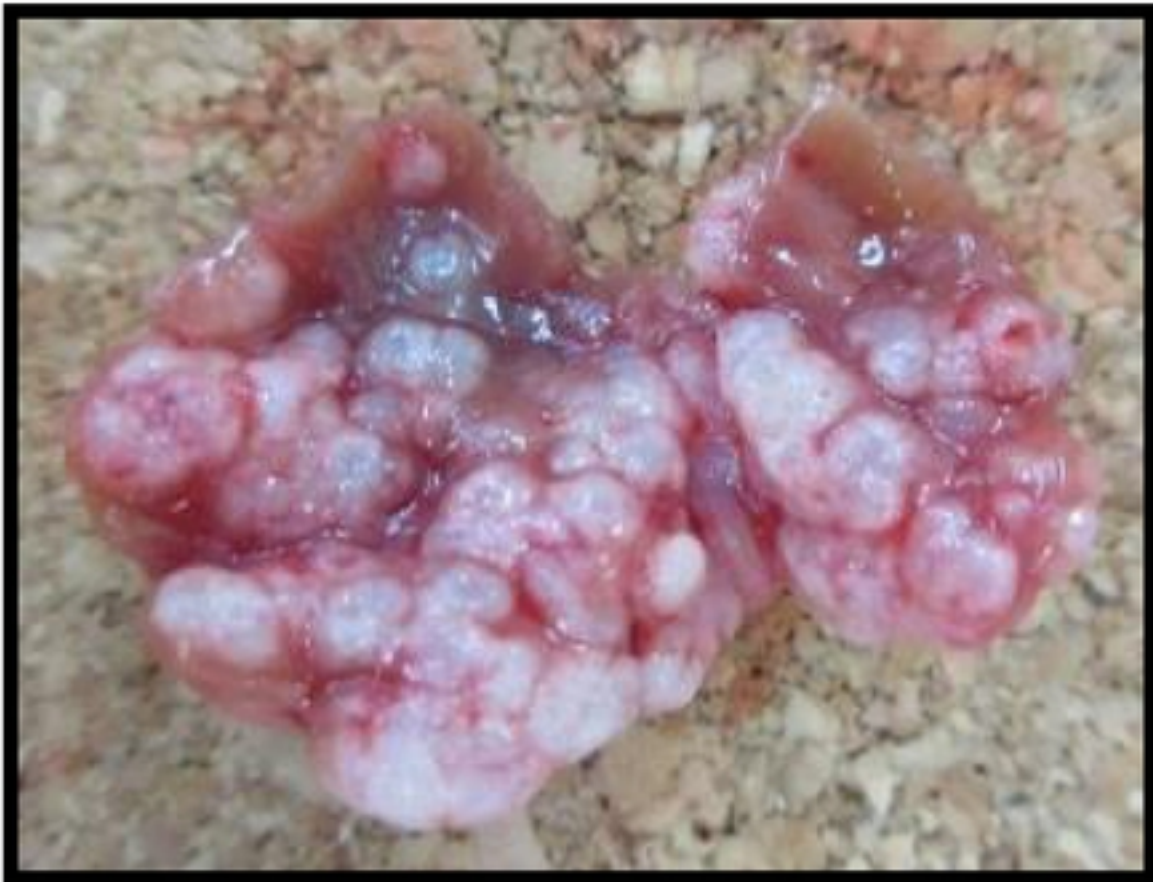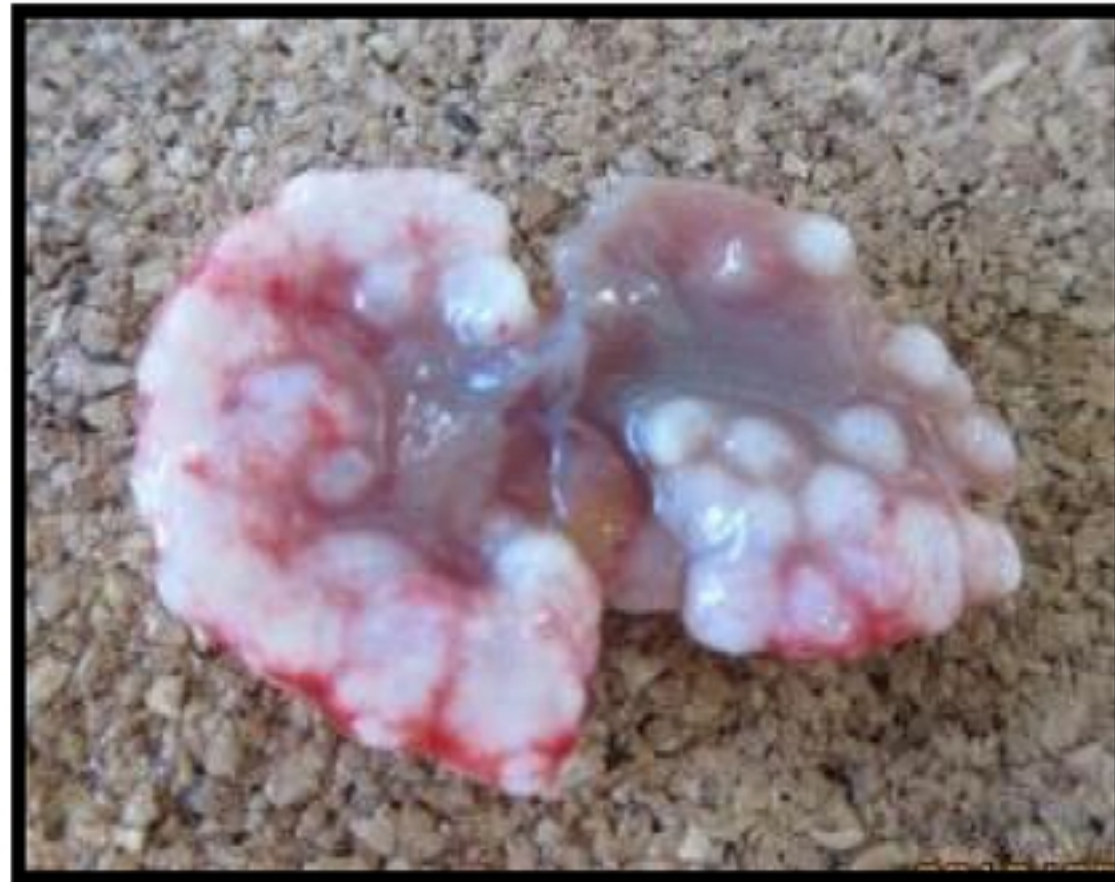

Figure 2

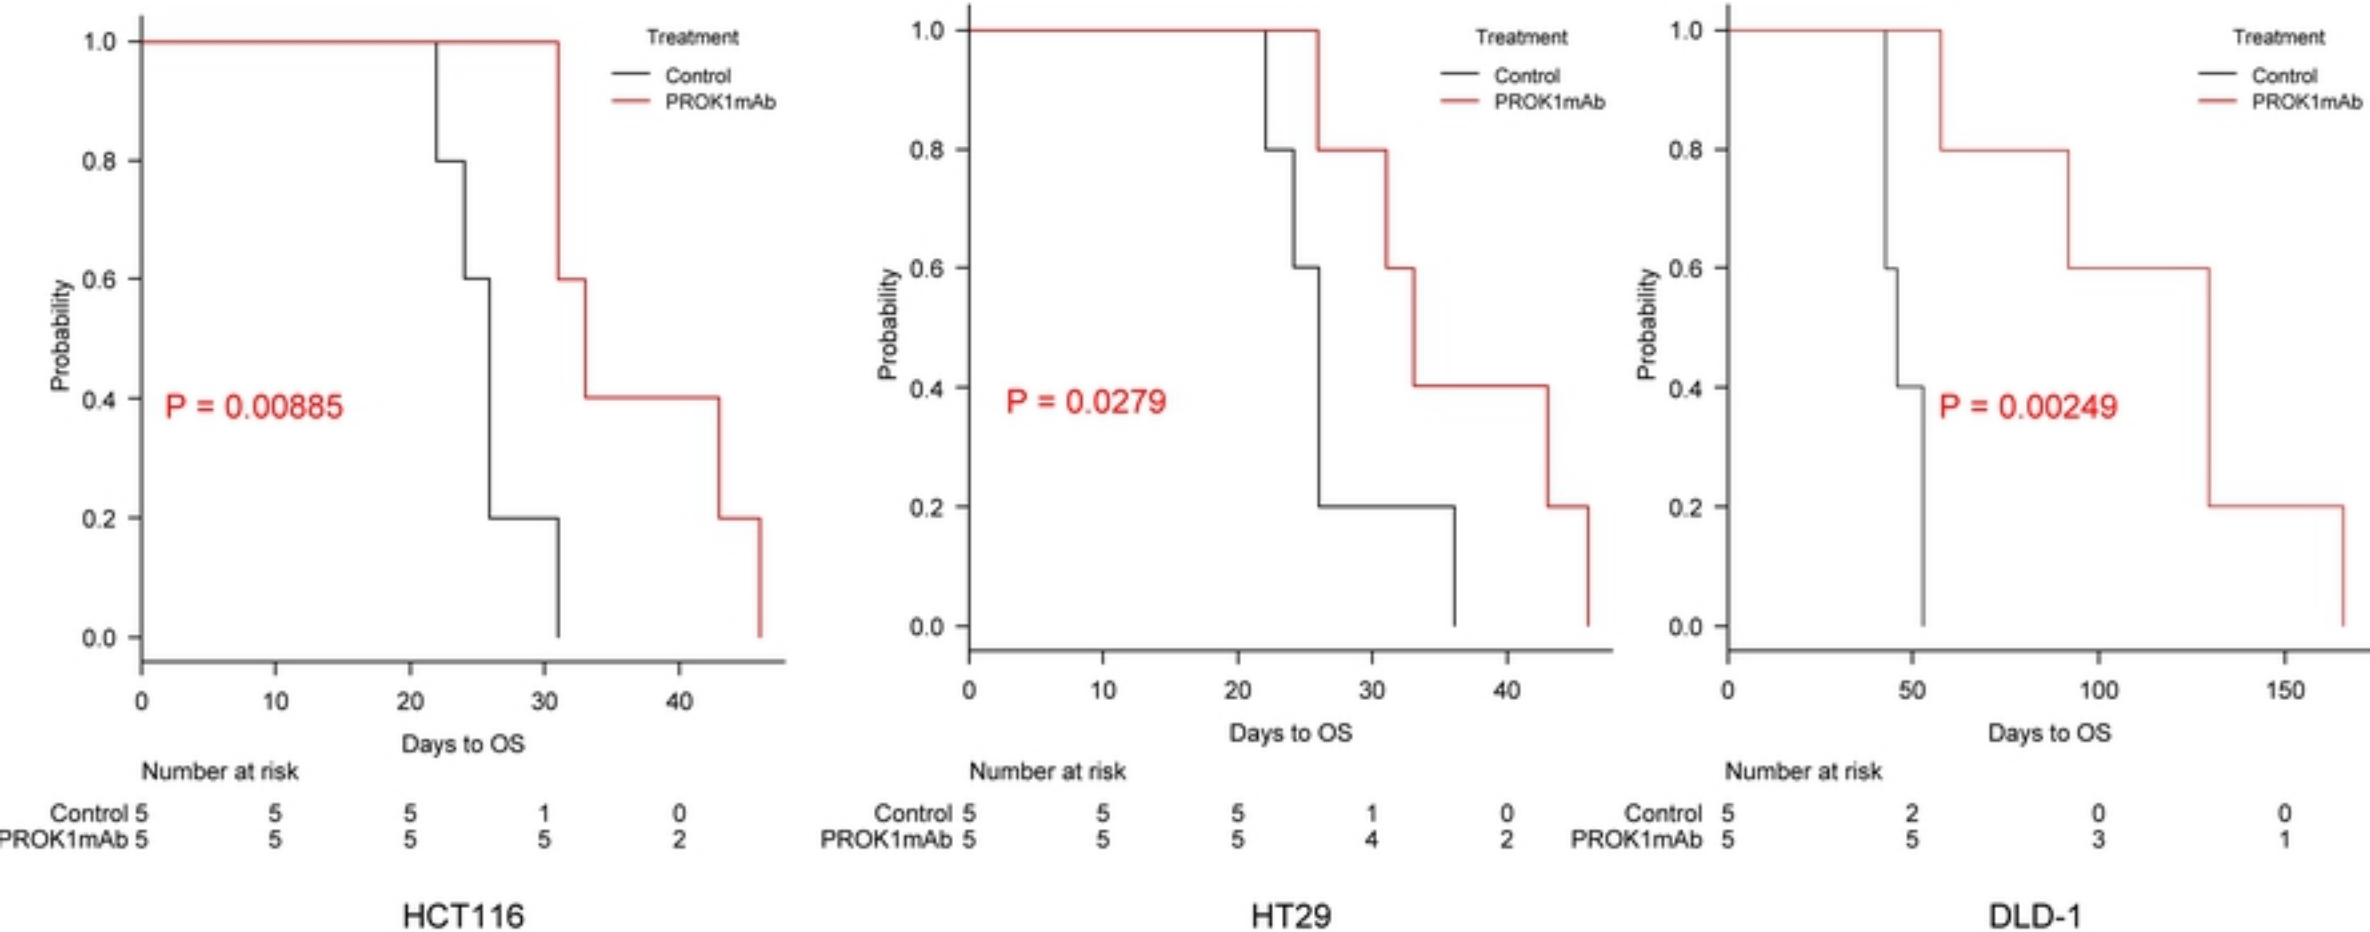

HCT116, HT29, and DLD-1 all showed a significant increase in survival time. The survival curve was created by the Kaplan-Meier method.

Figure3

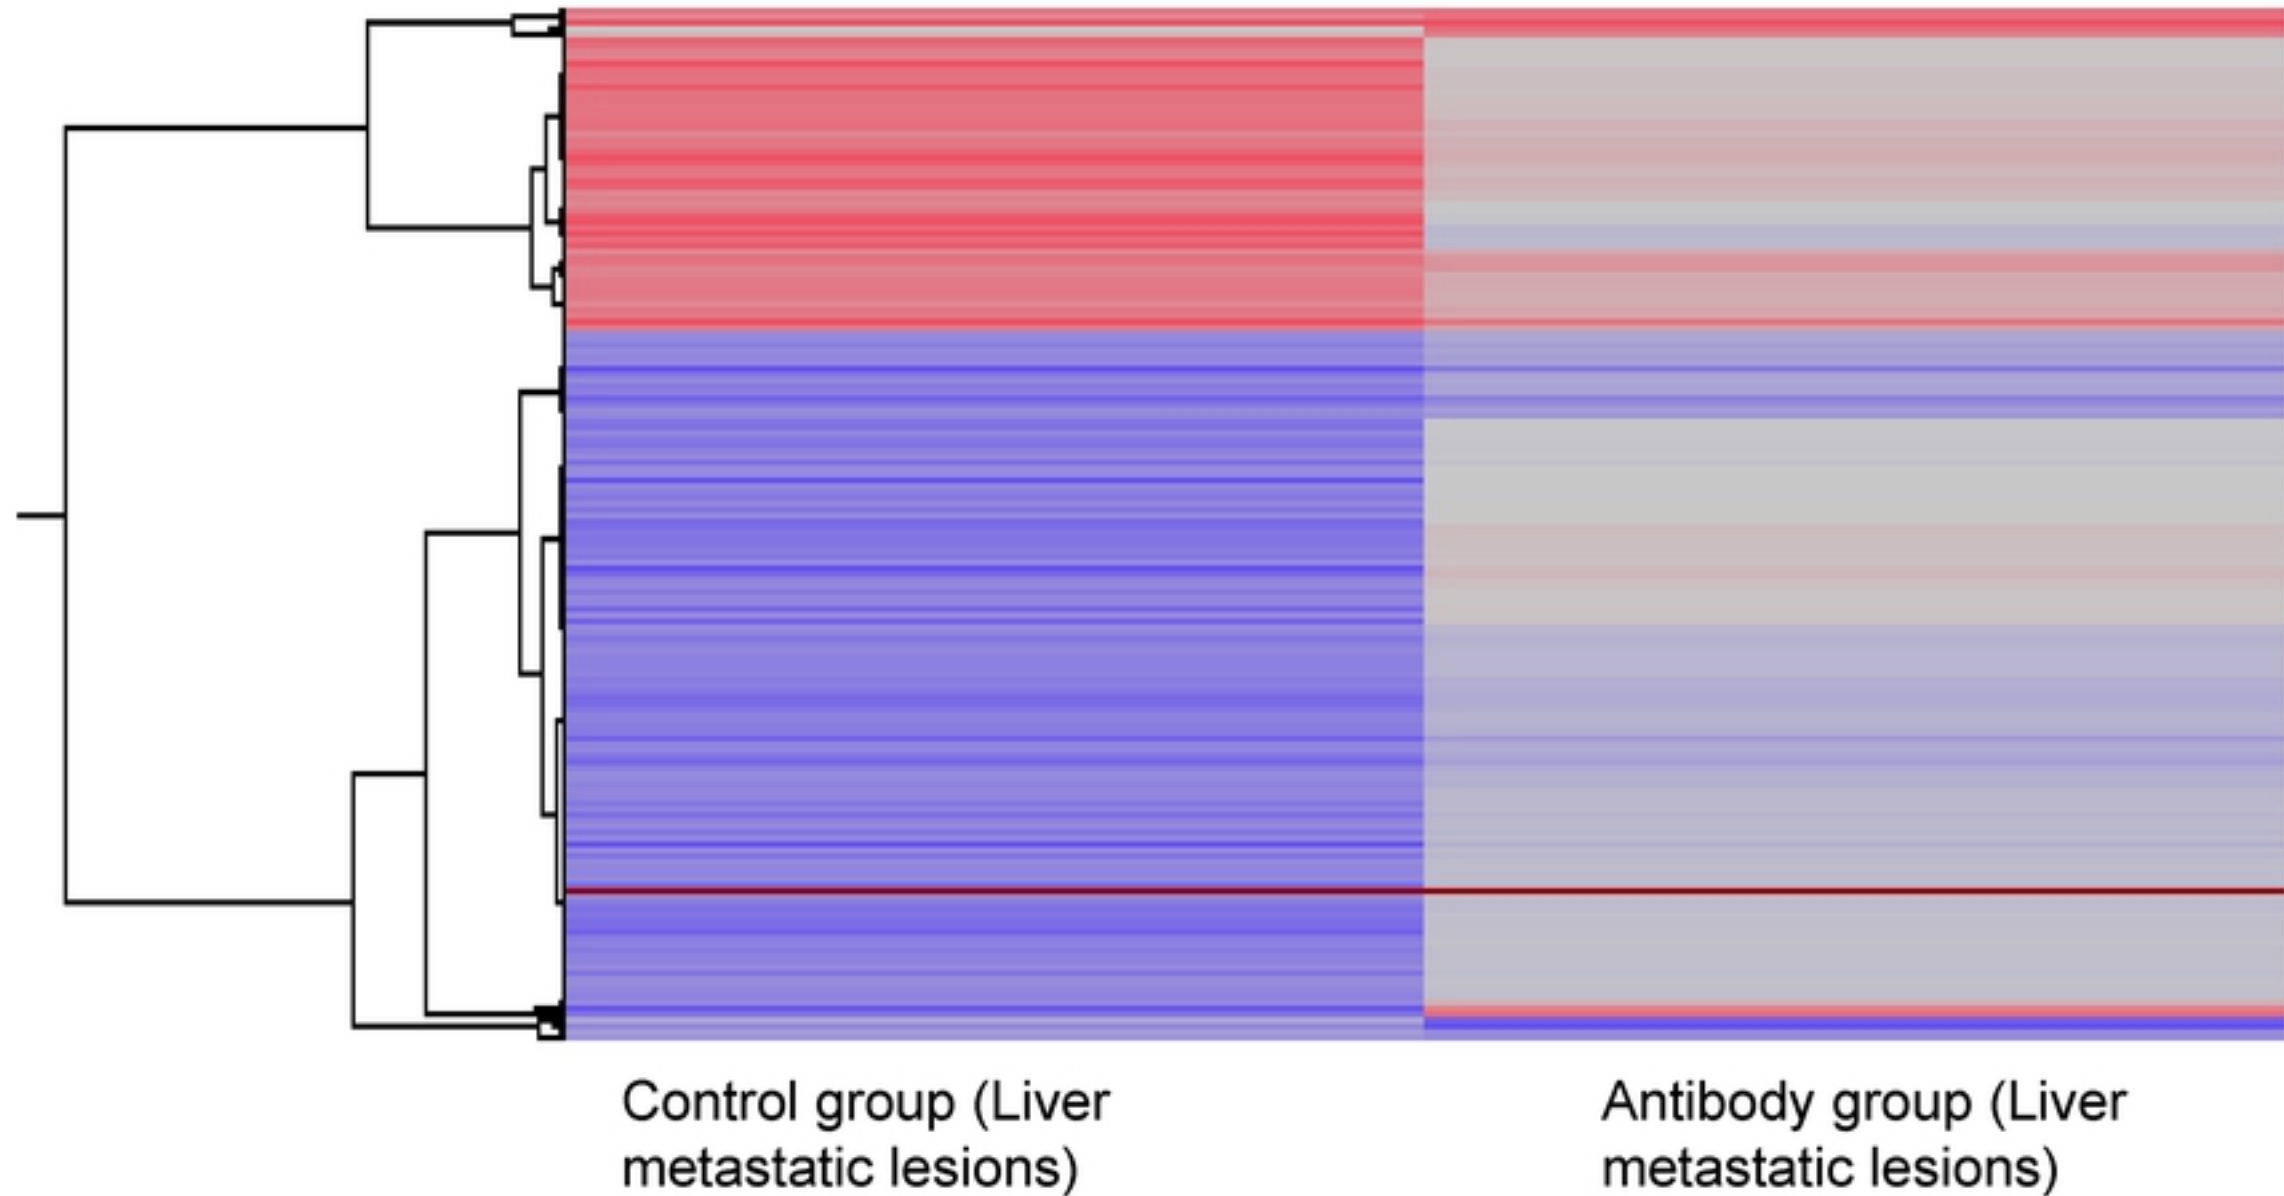

When microarray was performed on liver metastases at the time of mouse death, gene changes were suppressed in the antibody-administered group compared to the control group.

Figure4



a

| Genes involved in the oxidation reduction process (p = 0.0036) | Genes involved in apoptotic process (p = 0.0033)  | Genes involved in cell division (p = 0.042)             |
|----------------------------------------------------------------|---------------------------------------------------|---------------------------------------------------------|
| 3-hydroxyisobutyrate dehydrogenase(HIBADH)<br>(x0.444)         | BCL2 interacting protein 3 (BNIP3)<br>(x3.9449)   | Cell division cycle associated 5 (CDCA5)<br>(x0.3978)   |
| Superoxide dismutase3 (SOD3)<br>(x3.6301)                      | BUB1 mitotic checkpoint serine(BUB1)<br>(x0.4005) | NDC80,kinetochore complex Component(NDC80)<br>(x0.2432) |

b

| Genes involved in the P53 signaling pathway               |
|-----------------------------------------------------------|
| Cyclin D2 (CCND2)<br>(x0.4965)                            |
| Cyclin kinase2 (CDK2)<br>(x0.4931)                        |
| Insulin-like growth factor1 (IGF1)<br>(x5.5022)           |
| Apoptosis-related cysteine peptidase (CASP8)<br>(x0.4118) |

| Tumor suppressor genes                          |
|-------------------------------------------------|
| Transforming growth factor1(TGFβ1)<br>(x2.2501) |
| Transforming growth factor2(TGFβ2)<br>(x4.4076) |

\*Analysis was performed by David functional annotation.
